# Supplementary material for: Prevalence and Outcome of Neonatal Respiratory Failure of All Hospitalized Neonates in Handan in 2020
Source: Research Square preprint supplement (doi:10.21203/rs.3.rs-6735969/v1), 2025-07-08
Supplement: Supplementary file 1 [file 1df0f1b2887f7da568d17e51.docx]

Table S1. Univariable logistic regression analysis of the risk of death in NRF.

____________________________________________________________________________________________________________________

Variables Category Total, n All-death, n (%) OR (95% CI) P

____________________________________________________________________________________________________________________

Born in level III hospitals No 860 117 (13.6)

Yes 440 37 (8.4) 0.58 (0.40, 0.86) 0.007

Admitted to level III hospital No 526 83 (15.8)

Yes 774 71 (9.2) 0.54 (0.38, 0.76) <0.001

GA, weeks25-27 18 4 (22.2) 3.26 (0.99, 10.70) 0.052

28-31 241 72 (29.9) 4.85 (2.92, 8.06) <0.001

32-33 230 22 (9.6) 1.21 (0.65, 2.22) 0.551

34-36 341 19 (5.6) 0.67 (0.36, 1.26) 0.216

37-38 185 14 (7.6) 0.93 (0.48, 1.86) 0.843

> 39 285 23 (8.1) 1 (ref)

BW, g< 1,000 33 12 (36.4) 6.33 (2.92, 13.71) <0.001

1,000-1,499 171 44 (25.7) 3.84 (2.42, 6.08) <0.001

1,500-2,499 504 50 (9.9) 1.22 (0.80, 1.86) 0.361

2,500-3,999 531 44 (8.3) 1 (ref)

> 4,000 61 4 (6.6) 0.78 (0.27, 2.24) 0.640

SGA No 1,183 145 (12.3)

Yes 117 9 (7.7) 0.60 (0.30, 1.20) 0.149

Sex (male) No 473 59 (12.5)

Yes 827 95 (11.5) 0.91 (0.64, 1.29) 0.597

Maternal age, year < 20 19 1 (5.3) 0.41 (0.05, 3.10) 0.388

20-34 1,065 127 (11.9) 1 (ref)

> 35 216 26 (12.0) 1.01 (0.65, 1.59) 0.963

Rural resident registry No 290 29 (10)

Yes 1,010 125 (12.4) 1.27 (0.83, 1.95) 0.271

Nulliparous No 861 103 (12.0)

Yes 439 51 (11.6) 0.97 (0.68, 1.38) 0.855

HDP No 1,074 133 (12.4)

Yes 226 21 (9.3) 0.73 (0.48, 1.18) 0.193

GDM No 1,161 138 (11.9)

Yes 139 16 (11.5) 0.96 (0.56, 1.67) 0.897

Anemia No 1,143 145 (12.7)

Yes 157 9 (5.7) 0.42 (0.21, 0.84) 0.014

PROM No 1,072 135 (12.6)

Yes 228 19 (8.3) 0.63 (0.38, 1.04) 0.073

ANG No 828 121 (14.6)

Yes 472 33 (7.0) 0.44 (0.29, 0.66) <0.001

Cesarean delivery No 520 71 (13.7)

Yes 780 83 (10.6) 0.75 (0.54, 1.06) 0.100

AFC No 1,053 124 (11.8)

Yes 247 30 (12.1) 1.04 (0.68, 1.59) 0.871

PA No 1,199 144 (12.0)

Yes 101 10 (9.9) 0.81 (0.41, 1.58) 0.530

AUC No 1,296 153 (11.8)

Yes 4 1 (25.0) 2.49 (0.26, 24.09) 0.431

Apgar scores Apgar 1 min > 7 966 104 (10.8)

Apgar 1 min < 7 334 50 (15.0) 1.46 (1.02, 2.10) 0.041

Apgar 5 min > 7 1,140 110 (9.6)

Apgar 5 min < 7 160 44 (27.5) 3.55 (2.38, 5.29) <0.001

Twins/triplets No 1,203 150 (12.5)

Yes 97 4 (4.1) 0.30 (0.11, 0.83) 0.021

DR resuscitation No 965 97 (10.1)

Yes 335 57 (17.0) 1.84 (1.23, 2.61) <0.001

Admitted on 1st PND No 103 13 (12.6)

Yes 1,197 141 (11.8) 0.92 (0.50, 1.70) 0.800

SNAPPE - II <10 442 24 (5.4) 1 (ref)

10-19 636 81 (12.7) 2.54 (1.58, 4.08) <0.001

20-29 147 23 (15.6) 3.23 (1.76, 5.92) <0.001

30-39 37 9 (24.3) 5.60 (2.38, 13.18) <0.001

> 40 38 17 (44.7) 14.10 (6.59, 30.16) <0.001

Intensive care No NA NA

Yes 107 6 (5.6)

Critical care No 107 6 (5.6)

Yes 1,193 148 (12.4) 2.38 (1.03, 5.53) 0.043

**Comorbidities/complications**

CA No 1,185 114 (9.6)

Yes 115 40 (34.8) 5.01 (3.26, 7.70) <0.001

Asphyxia No 936 96 (10.3)

Yes 364 58 (15.9) 1.66 (1.17, 2.36) <0.001

IVH III-IV No 1,049 143 (13.6)

Yes 251 11 (4.4) 0.29 (0.16, 0.55) <0.001

RDS No 768 81 (10.5)

Yes 532 73 (13.7) 1.35 (0.96, 1.89) 0.082

CP/EOS No 809 113 (14.0)

Yes 491 41 (8.4) 0.56 (0.39, 0.82) 0.003

MAS No 1,282 148 (11.5)

Yes 18 6 (33.3) 3.83 (1.42, 10.36) 0.008

PH No 1,275 139 (10.9)

Yes 25 15 (60.0) 12.26 (5.40, 27.82) 0.027

NEC No 1,285 149 (11.6)

Yes 15 5 (33.3) 3.81 (1.29, 11.30) 0.016

LOS No 1,213 144 (11.9)

Yes 87 10 (11.5) 0.96 (0.49, 1.91) 0.916

NI No 1,213 149 (12.3)

Yes 87 5 (5.7) 0.44 (0.17, 1.09) 0.076

**Respiratory support and ancillary medications**

Surfactant No 951 108 (11.4)

Yes 349 46 (13.2) 1.19 (0.82, 1.71) 0.368

Critical care (use surfactant) No 979 108 (11.0)

Yes 321 46 (14.3) 1.35 (0.93, 1.96) 0.113

Ventilation mode CPAP/NIV (only) 833 75 (9.0) 1 (ref)

CPAP/NIV initial to MVa 77 9 (11.7) 1.34 (0.64, 2.79) 0.438

MV (only) 178 65 (36.5) 5.81 (3.95, 8.56) <0.001

MV initial to CPAP/NIVb 212 5 (2.4) 0.24 (0.10, 0.61) 0.003

Critical care (use MV) No 866 75 (8.7)

Yes 434 79 (18.2) 2.35 (1.67, 3.30) <0.001

Postnatal glucocorticoids No 1,133 149 (13.2)

Yes 167 5 (3.0) 0.20 (0.08, 0.51) <0.001

___________________________________________________________________________________________________________________

For abbreviations, see Table 1 and 3 legends. N.A., data not available.

a. It denotes to be followed by MV, refers CPAP/NIV failure (see ref. 37)

b. It denotes to be transfered to CPAP/NIV, refers succeed in weaning from MV and extubation.

Table S2. Comparison of prevalence, clinical management and outcome of NRF between surveys of Huai’an in 2015 and Handan in 2020.

____________________________________________________________________________________________________________________

Huai’an 2015 Handan 2020

____________________________________________________________________________________________________________________

Total births 59,245 79,290

GA 25-27 weeks (‰) 85 (1.4) 132 (1.7)

Stillbirths (‰) 189 (3.2) 278 (3.5)

Total livebirths, n (% of births) 59,056 (99.7) 79,012 (99.6)

Total preterm births, n (% of births) 2,651 (4.5) 3,463 (4.4)

Total hospitalized, n (% of livebirths) 7,960 (13.5) 10,840 (13.7)

Preterm hospitalized, n (%) # 1,941 (73.2; 24.4) 2,512 (75.0; 23.2)

NRF, n 788 1,300

Prevalence of NRF, % of hospitalized 9.9 12.0***

Incidence of NRF, ‰ of livebirths 13.3 16.5***

All-death, n ## 145 154

Case fatality rate, % 18.4 11.8***

Mortality rate, ‰ of livebirths 2.5 1.9***

**Demographic and clinical characteristics**

Male, n (%) 476 (60.4%) 827 (63.6%)

GA, weeks, mean + SD (Range) 34.5 + 4.0 (25-42) 35.2 + 3.7 (25-42)

< 37 weeks, n (% of NRF) 528 (67.0) 830 (63.8)

< 32 weeks 227 (28.8) 259 (19.9)***

25-27 weeks 39 (4.9) 18 (1.4)***

BW, g (range) 2,334 + 886 (700-5,700) 2,445 + 876 (590-6,400)

< 2,500 g 453 (57.5) 504 (38.8)***

< 1,500 g 156 (19.8) 171 (13.2)***

500-999 g 20 (2.5) 33 (2.5)

SNAPPE - II 10 [5, 19] 10 [8, 18]

Intensive care 53 (6.7) 107 (8.2)

Critical care 733 (93.0) 1,193 (91.8)

**Respiratory morbidities, n (% of NRF)**

RDS 287 (36.4) 532 (40.9)*

Surfactant 195 (67.9) 317 (59.6)

Survival rate (% of RDS) 225 (78.4) 459 (86.3)**

MAS 13 (1.6) 18 (1.4)

Survival rate (% of MAS) 7 (53.8) 12 (66.6)

CP/EOS 278 (35.3) 491 (37.8)

PH 30 (3.8) 25 (1.9)**

PPHN 61 (7.7) 19 (1.5)***

Air leak 47 (6.0) 60 (4.6)

BPD II-III 72 (9.1) 24 (1.8)***

Surfactant 219 (27.8) 349 (26.8)

CPAP 637 (80.8) 1,122 (86.3)***

MV 348 (44.2) 467 (35.9)***

Postnatal steroids 124 (15.7) 167 (12.8)

____________________________________________________________________________________________________________________

For abbreviations, see Table 1 legends. All values are presented as mean + standard deviation (SD), or median [interquartile range, IQR], or n (%) or rate (%) referring to total NRF number in each column unless otherwise indicated. *P <0.05, **P<0.01 and ***P <0.001 vs. NRF prevalence, clinical management and outcome of Huai’an in 2015, by Pearson Chi square test.

# Percentages refer to total preterm births and total hospitalized numbers, respectively.

## Including parental requested withhold and withdraw cases.

The Huai’an data are derived from references 17-20, 23 and 24.
