# Supplementary material for: Prevalence and Outcome of Neonatal Respiratory Failure of All Hospitalized Neonates in Handan in 2020
Source: Research Square preprint supplement (doi:10.21203/rs.3.rs-6735969/v1), 2025-07-08
Supplement: Supplementary file 2 [file bb71e341f9ce0b9bcbd30d1e.docx]

**Criteria of admission and care level of neonatal intensive care unit (NICU)** [21,22]

Admission to NICU was for moderate to severe morbidities, in which intensive care includes those with Apgar score <7 at 5 min of birth; BW >1000 g but <2100 g; hypoxemic condition requiring inspired fraction of oxygen (FiO2) <0.4, with or without non-invasive/assisted ventilation, or high flow device, with no time limit; NEC stage I or stable NEC requiring total parenteral nutrition; hyperbilirubinemia requiring phototherapy; mild to moderate hypoxemic-ischemic encephalopathy (HIE) not requiring hypothermic therapy; suspected or established pneumonia/sepsis requiring antibiotic use, fluid infusion; unstable oxygenation requiring long term oxygen therapy; patent ductus arteriosus (PDA) of hemodynamic significance in need of medication for closure; and in convalescence from intensive or critical care, etc.

Critical care was provided to those with severe perinatal and neonatal morbidities, such as Apgar score at 5 min <3, gestational age (GA) <28 week, BW<1000 g, IVH grade III-IV, RDS and pneumonia/sepsis requiring intratracheal/mandatory ventilation, hemodynamic instability requiring vasopressors or inotropes, or complicated with pulmonary hypertension;moderate to severe HIE requiring hypothermic therapy; hyperbilirubinemia requiring exchange transfusion, moderate-to-severe BPD, NEC stage II-III, neurological impairment (encephalopathy, periventricular leukomalacia) requiring robust monitoring and intervention; NEC, PDA and other pathologies requiring peri-surgical care, continuous renal replacement therapy, extracorporeal membrane oxygenation, etc.

Definitions of pregnancy co-morbidities and complications

Hypertensive disorder of pregnancy (HDP) included chronic hypertension,

new-onset gestational hypertension, preeclampsia, eclampsia and other associated

morbidities.[25] Gestational diabetes mellitus (GDM) relied on glucose

intolerance test.[26] Anemia of pregnancy was defined as a hemoglobin

concentration less than 80 g/L.[27] Placental abnormalities (PA) include placenta

previa and placental abruption. Placenta previa was defined as after 28 weeks’

GA the edge of the placenta reaches or covers the inner opening of the cervix,

and its position is lower than that of the fetal presentation. Placental abruption

was defined as after 20 weeks of gestation or during delivery, the placenta in its

normal position was partially or completely removed from the uterine wall before

delivery of the fetus. Abnormal umbilical cord (AUC) included excessively short

or long umbilical cord, umbilical cord entanglement, knotting, twisting, and

prolapse. Antenatal glucocorticosteroids (ANG) was given on assumption that preterm birth would be expected within 24 hours to 7 days, and betamethasone was given by regimen of 12 mg each time, 24 hours apart as twice course, by intramuscular injection, or 6 mg each time, 12 hours apart, as 4-time course. Amniotic fluid contamination (AFC) is explained as meconium-stained one secondary to fetal distress in more mature pregnancy, and often requiring resuscitation at delivery to remove meconium debries from laryngopharyngeal and airway. The meconium-stained amniotic fluid may present as light yellow-brown, dark brown, or brown-greenish with meconium.

Definitions of perinatal co-morbidities and complications for newborns

Perinatal co-morbidities:

Respiratory distress syndrome (RDS) was diagnosed by clinical evidence of respiratory difficulties at birth and early hours of life, hypoxemia and chest X-ray appearances.[29]

Pneumonia/sepsis included chest X-ray evidence, positive culture and clinical confirmation excluding aspiration, taking fetal inflammation response, congenital pneumonia (CP), early respiratory distress with positive bacterial culture within the first three PND as early onset sepsis (EOS), leaving those with bacterial culture-confirmed systemic infection beyond the first three PND as late onset sepsis (LOS), along with pulmonary and extra-pulmonary organ dysfunction or failure.

Bronchopulmonary dysplasia (BPD) was considered only for those of moderate to severe BPD, defined as requiring supplemental oxygen at 36 weeks’ post menstrual age or at discharge, or NIV/MV.[30]

Intraventricular hemorrhage (IVH) was diagnosed within 7 PND by cranial

ultrasound, and grade III and IV being considered as severe.[31]

Encephalopathy included hypoxic ischemia encephalopathy, periventricular leukomalacia, acute bilirubin encephalopathy / kernicterus, and cerebral lesions due to hypoglycemia.[32]

Encephalopathy included hypoxic ischemia encephalopathy (HIE), acute

bilirubin encephalopathy/kernicterus, cerebral lesions due to hypoglycemia, and

periventricular leukomalacia (PVL).[33]

Use of postnatal steroids

Postnatal steroids usually refer to glucocorticoids: for preterm infants > 12-14 days, FiO2 >60%, and ventilator dependent, a short course (7 days) of low-dose dexamethasone: 0.25 mg/kg, every 12 hours, for 4 days, followed by 0.05 mg/kg, every 12 hours, for 3 days when appropriate. Dexamethasone was also used for airway edema after extubation: a total of 3 doses, the first dose (0.25 mg/kg) can be given 8-12 hours before extubation, then repeated at 12 hours intervals.[36] For high-risk infants with BPD who could not be extubated after 1 to 2 weeks of MV, a short course of low-dose dexamethasone: starting dose of 0.15 mg/(kg.d) intravenous infusion was used for 3 days, the dose was reduced to 0.10 mg/(kg.d) for 3 days, then to 0.05 mg/(kg.d) for 2 days, and finally to 0.02 mg/(kg.d) for 2 days, the whole course lasted for 10 days, and the cumulative dose was 0.89 mg/kg.[33]

Note: All the reference numbers refer to that in the body text.
